# Supplementary material for: Stimuli responsive hydrogels derived from a renewable resource: synthesis, self-assembly in water and application in drug delivery
Source: Royal Society of Chemistry journal article supplement (doi:10.1039/c5tb00864f), 2015-01-01
Supplement: c5tb00864f1.pdf [file c5tb00864f1.pdf]

# Supporting Information

## **Stimuli Responsive hydrogel derived from Renewable Resource: Synthesis, Self-Assembly in water and application in drug delivery**

Krishnamoorthy Lalitha,<sup>a</sup> Y. Siva Prasad,<sup>a</sup> C. Uma Maheswari,<sup>a</sup> Vellaisamy Sridharan,<sup>a</sup> George John,<sup>b</sup> Subbiah Nagarajan\*<sup>a</sup>

*<sup>a</sup> Organic Synthesis Group, Department of Chemistry & The Centre for Nanotechnology and Advanced Biomaterials, School of Chemical and Biotechnology, SASTRA University, Thanjavur - 613401, Tamil Nadu, INDIA Fax: 04362264120; Tel: 04362304270; E-mail: [nagarajan@scbt.sastra.edu](mailto:nagarajan@scbt.sastra.edu).*

*<sup>b</sup> Department of Chemistry, the City College of New York. 160 Convent Ave. New York, NY 10031.*

**Table S1:** Vegetable oil/Solvent used for gelation studies

| S.No | Oil/Solvent     | 4a | 4b | 4c |
|------|-----------------|----|----|----|
| 1    | Hazelnut        | P  | P  | P  |
| 2    | Sesame          | P  | P  | P  |
| 3    | Jojoba          | P  | P  | P  |
| 4    | Olive           | P  | P  | P  |
| 5    | Soyabean        | P  | P  | P  |
| 6    | Linseed         | P  | S  | S  |
| 7    | Light paraffin  | P  | P  | P  |
| 8    | Heavy paraffin  | P  | PG | PG |
| 9    | Dodecanol       | I  | S  | S  |
| 10   | Ethanol         | P  | P  | S  |
| 11   | n-Butanol       | P  | S  | S  |
| 12   | Octanol         | P  | S  | S  |
| 13   | Toluene         | I  | I  | I  |
| 14   | Cyclohexane     | I  | I  | I  |
| 15   | n-heptane       | I  | I  | I  |
| 16   | Ethylene glycol | I  | I  | I  |
| 17   | Ethanol+water   | S  | S  | PG |
| 18   | DMSO            | S  | S  | S  |
| 19   | DMF             | S  | S  | S  |
| 20   | DMSO+water      | S  | PG | G  |
|      | DMF+water       | S  | S  | S  |

S – Soluble; I – Insoluble; P – Precipitation; PG – Partial gel formation

Calculated quantity of gelator was taken in a separate glass vial and about 20-30  $\mu$ L of DMSO was added. The vials were heated to dissolve the compounds and then distilled water was added drop wise. The formation of cloudy white solution was observed which was again heated to get clear homogeneous solution and cooled to room temperature to form hydrogel. Gel formation has been observed within 5-6 h. The thermoreversibility of these gels were confirmed by repeating heating and cooling experiments.

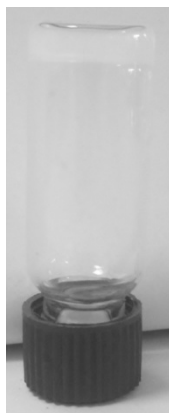

**Figure S1** Photograph of the hybrid hydrogel formed from compound **4c**.

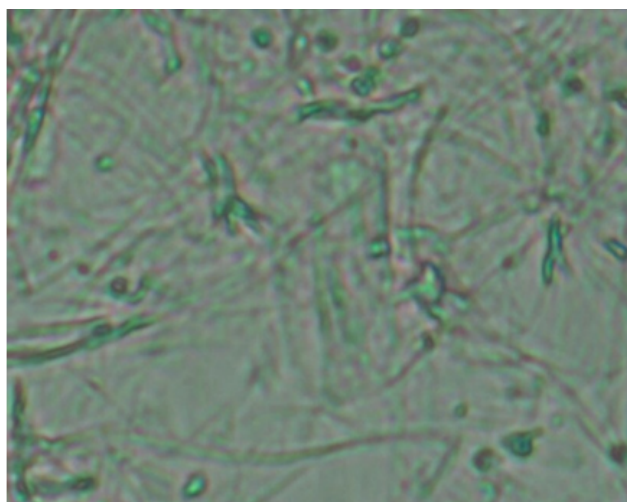

**(a)** Optical microscopy image of compound **4c** in acidic pH (pH = 4.0)

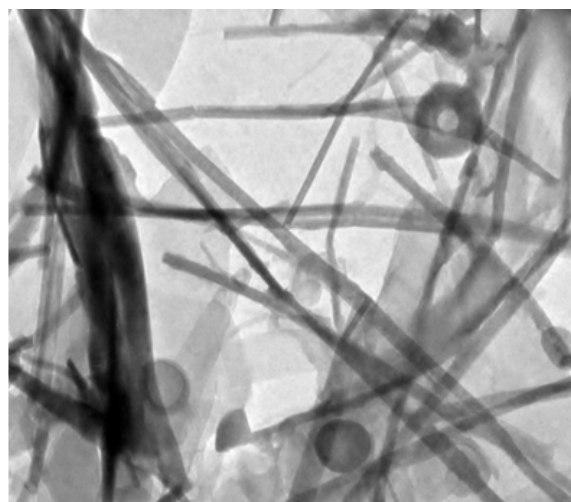

**(b)** HRTEM image of compound **4c** in acidic pH (pH = 4.0)

**Figure S2.** Morphology of self-assembled fibers formed from **4c** in acidic pH.

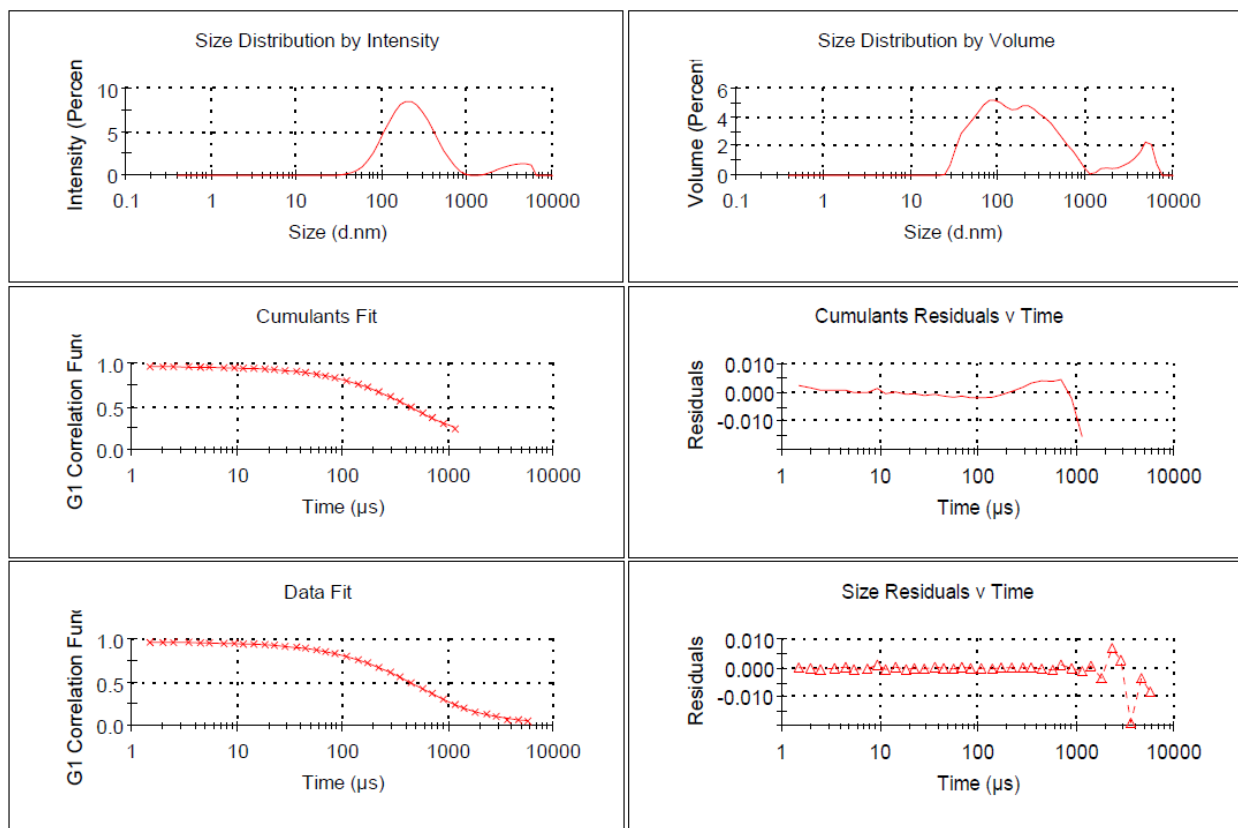

**Figure S3** - Zetasizer report of **4c**, average diameter of micelles is 197nm

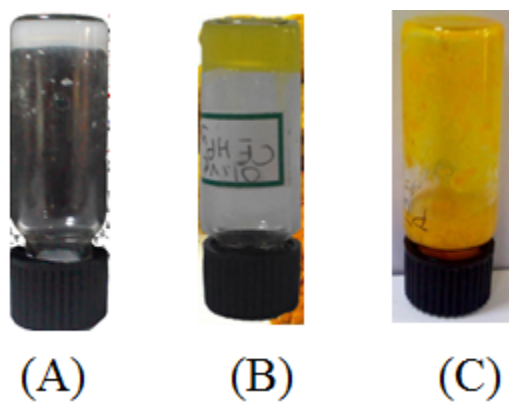

**Figure S4.** Photographs of the gel (a) without curcumin (B) with curcumin drug (C) curcumin loaded gel in acidic buffer pH 4

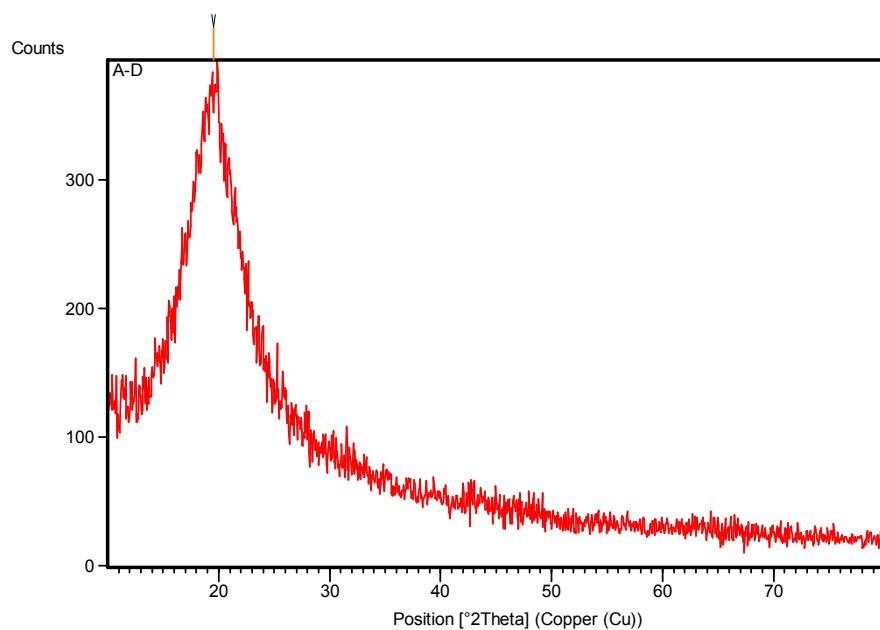

**Figure S5.** WAXD data for gel.

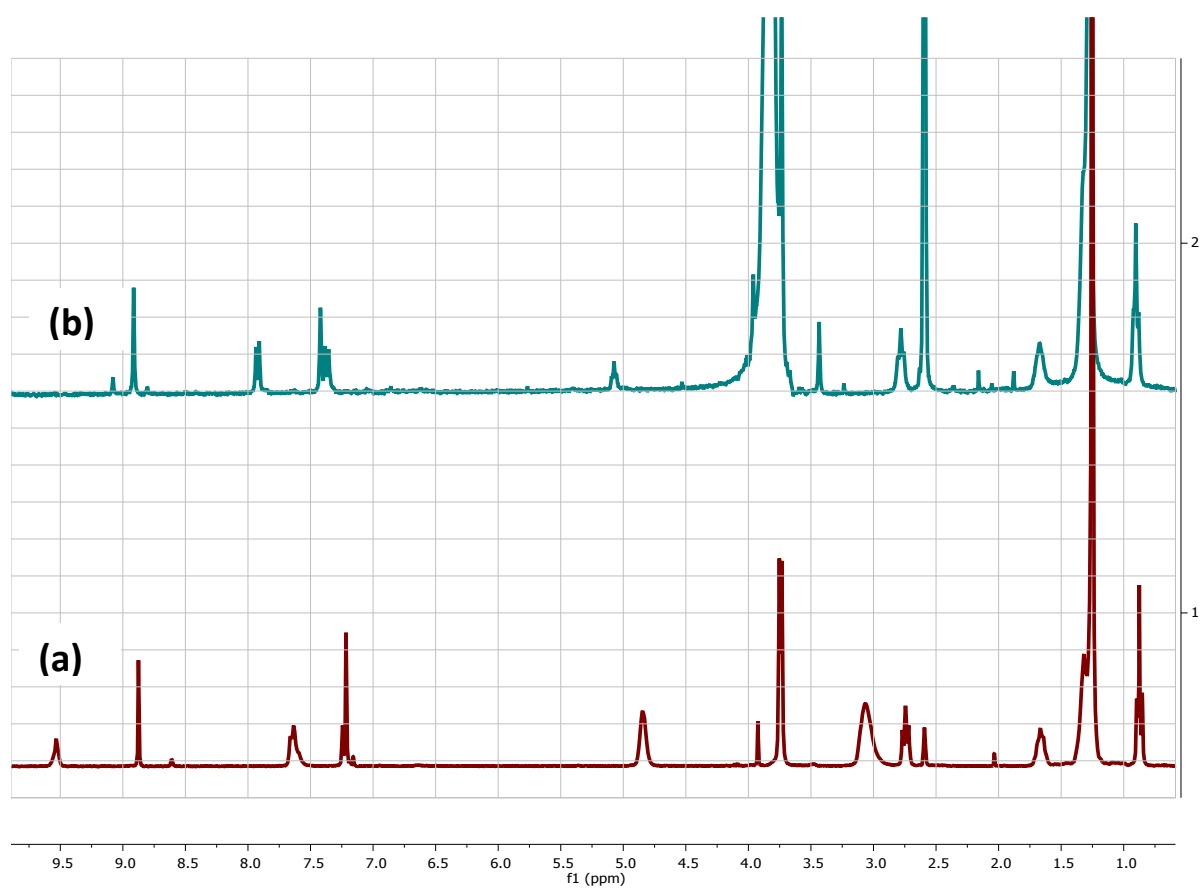

**Figure S6.** <sup>1</sup>H NMR spectra of (a) gelator, **4c** in DMSO-*d*<sub>6</sub> and (b) gel formed by **4c** in DMSO-*d*<sub>6</sub>-D<sub>2</sub>O (1:2 ratio).

# Copies of $^1\text{H}$ and $^{13}\text{C}$ spectra

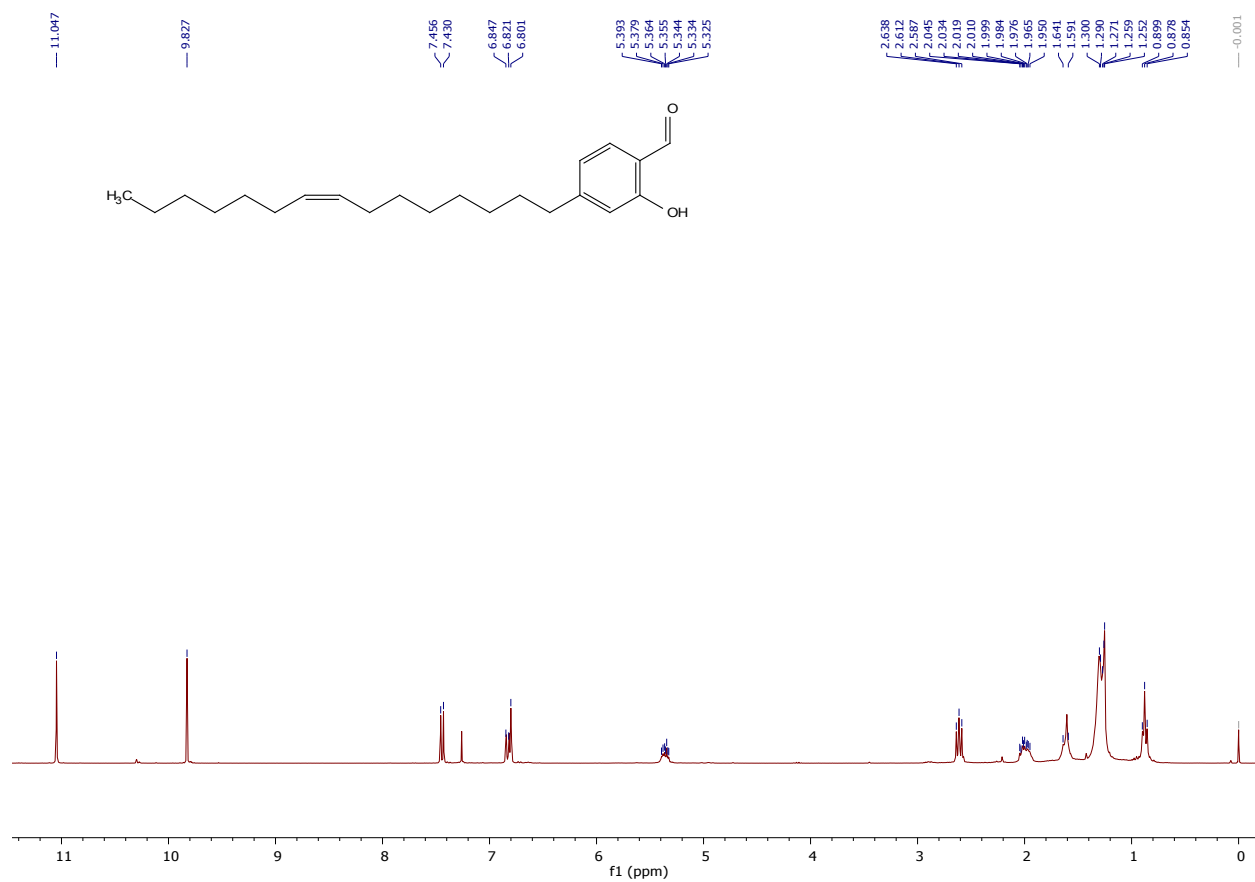

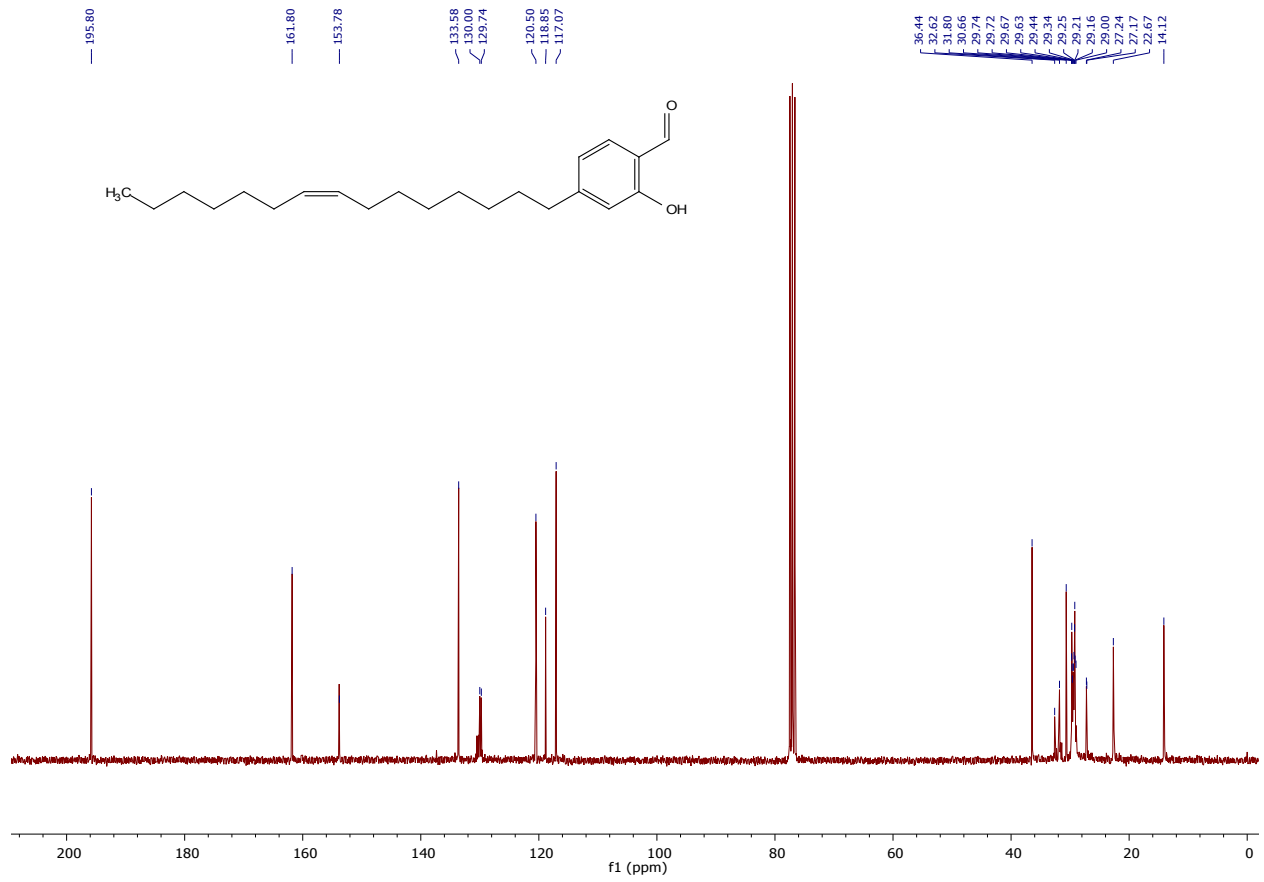

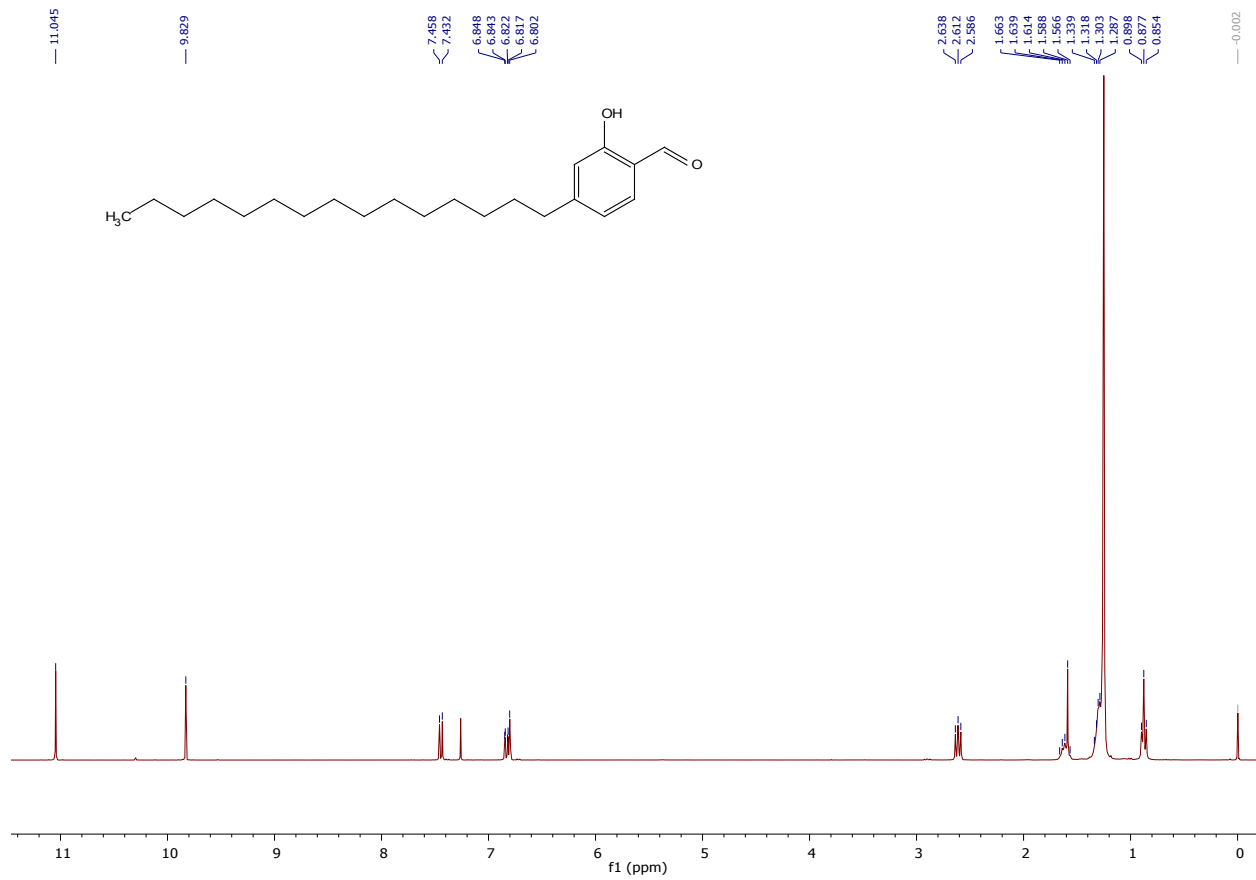



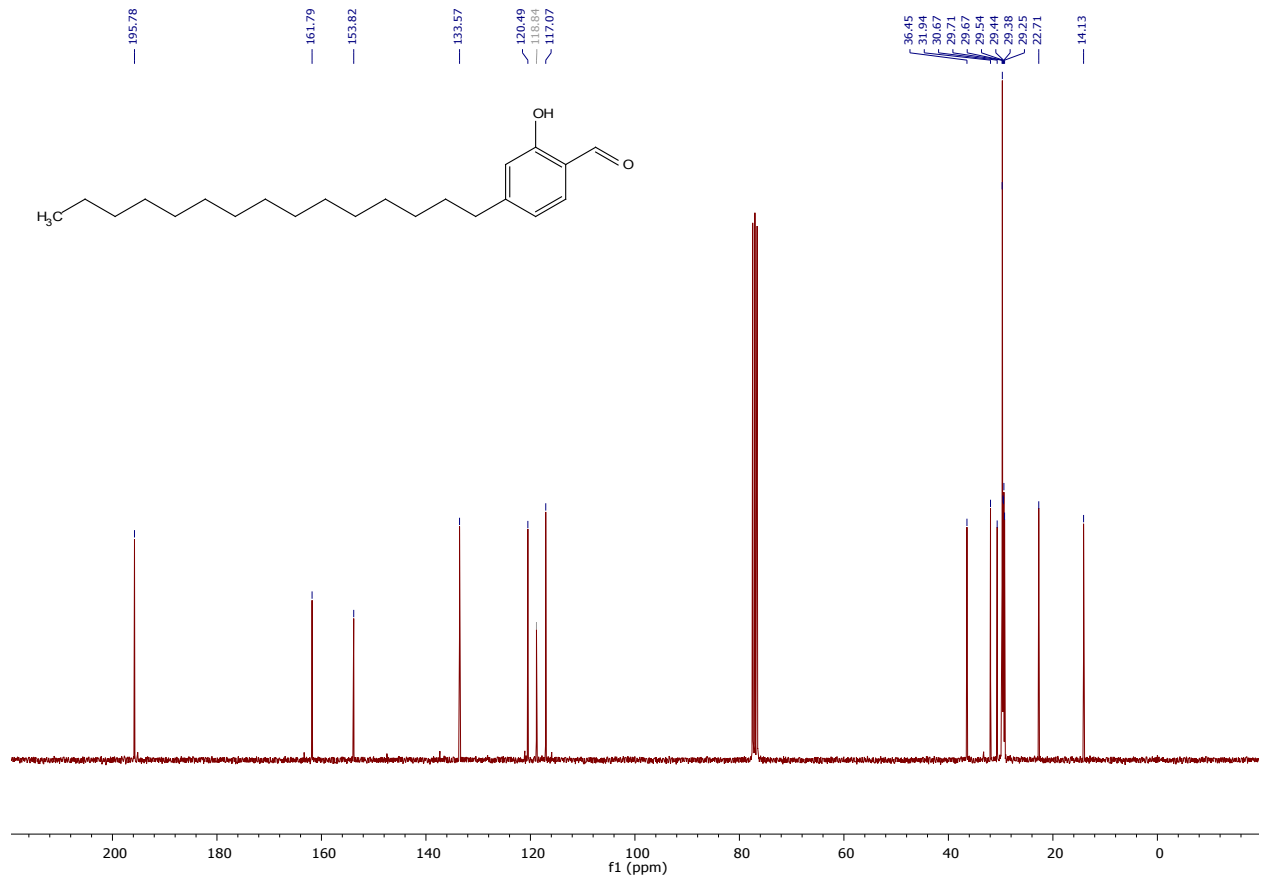

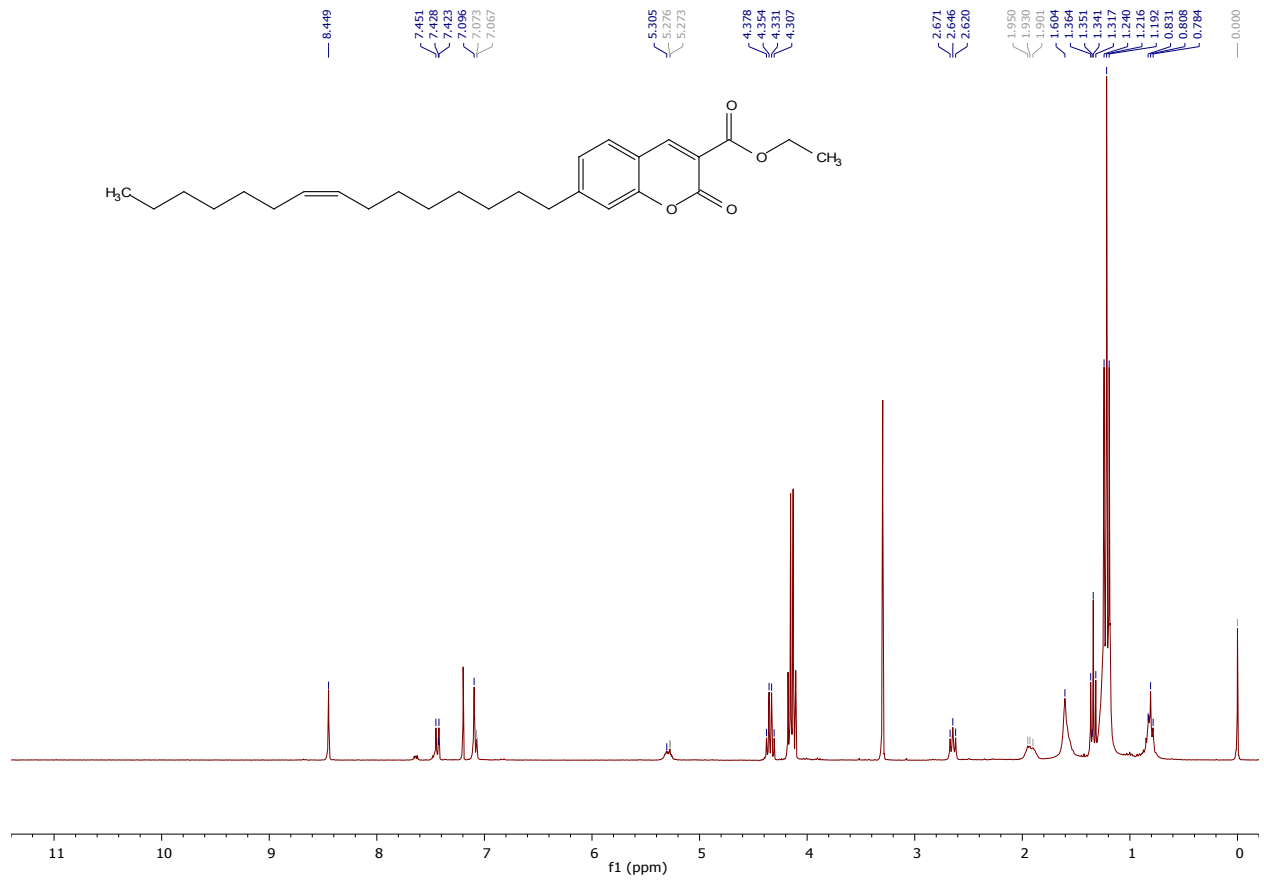

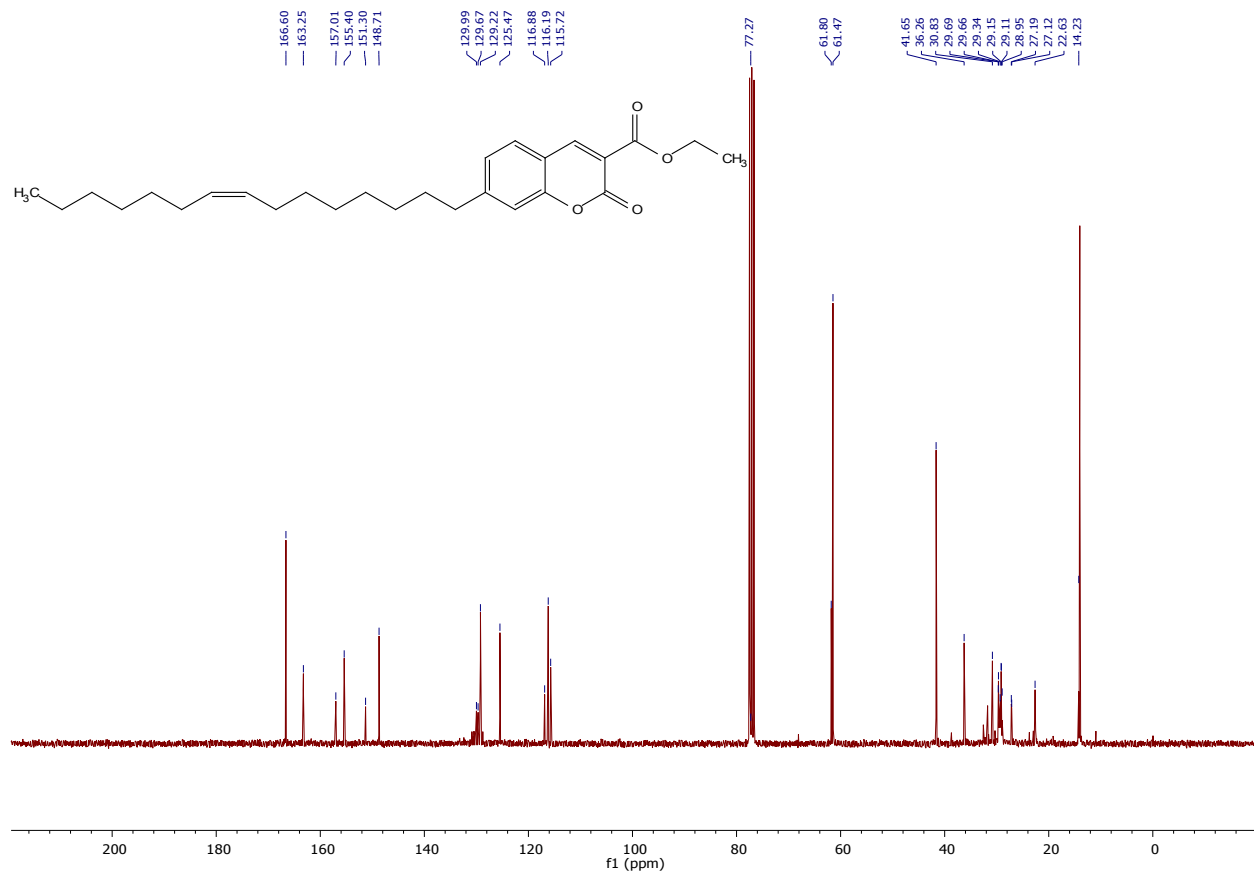

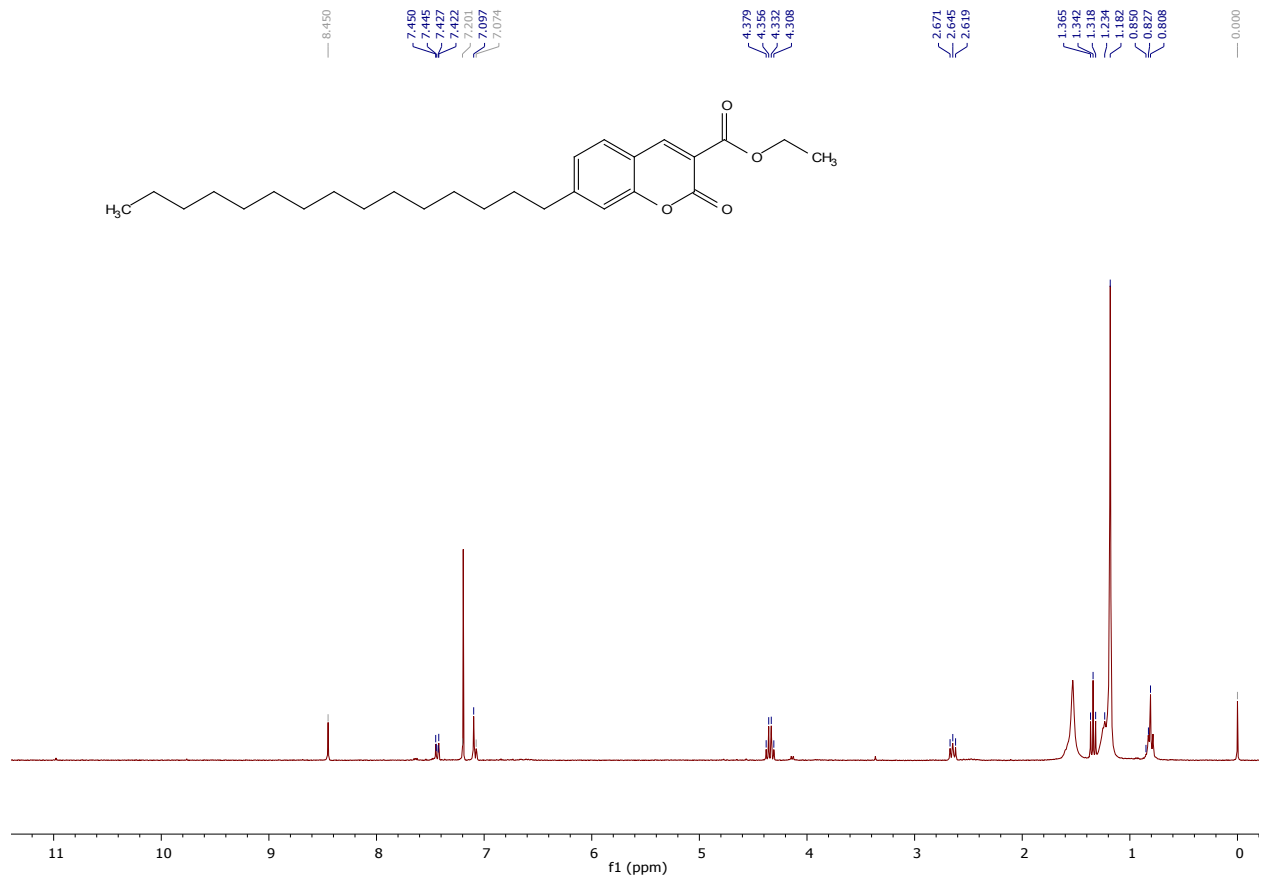

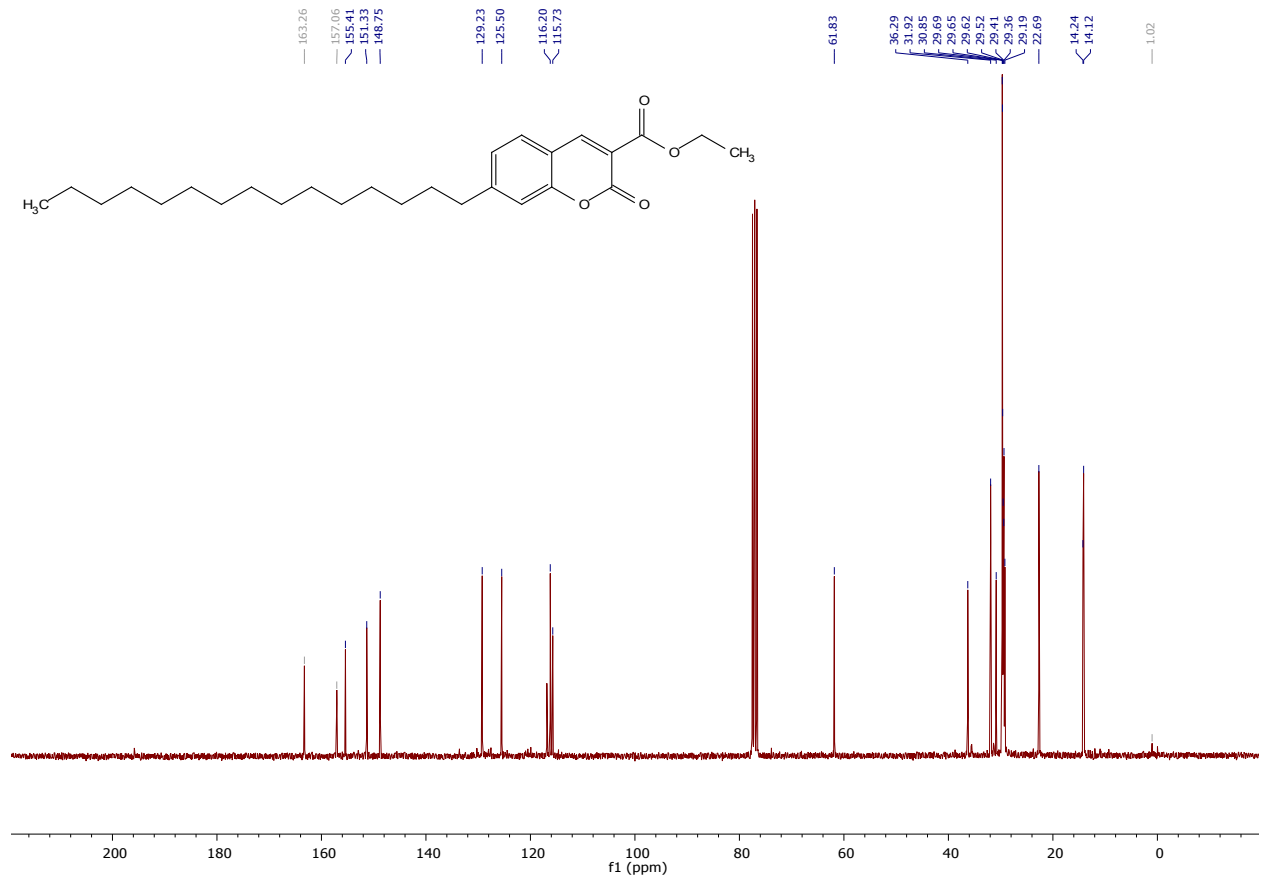



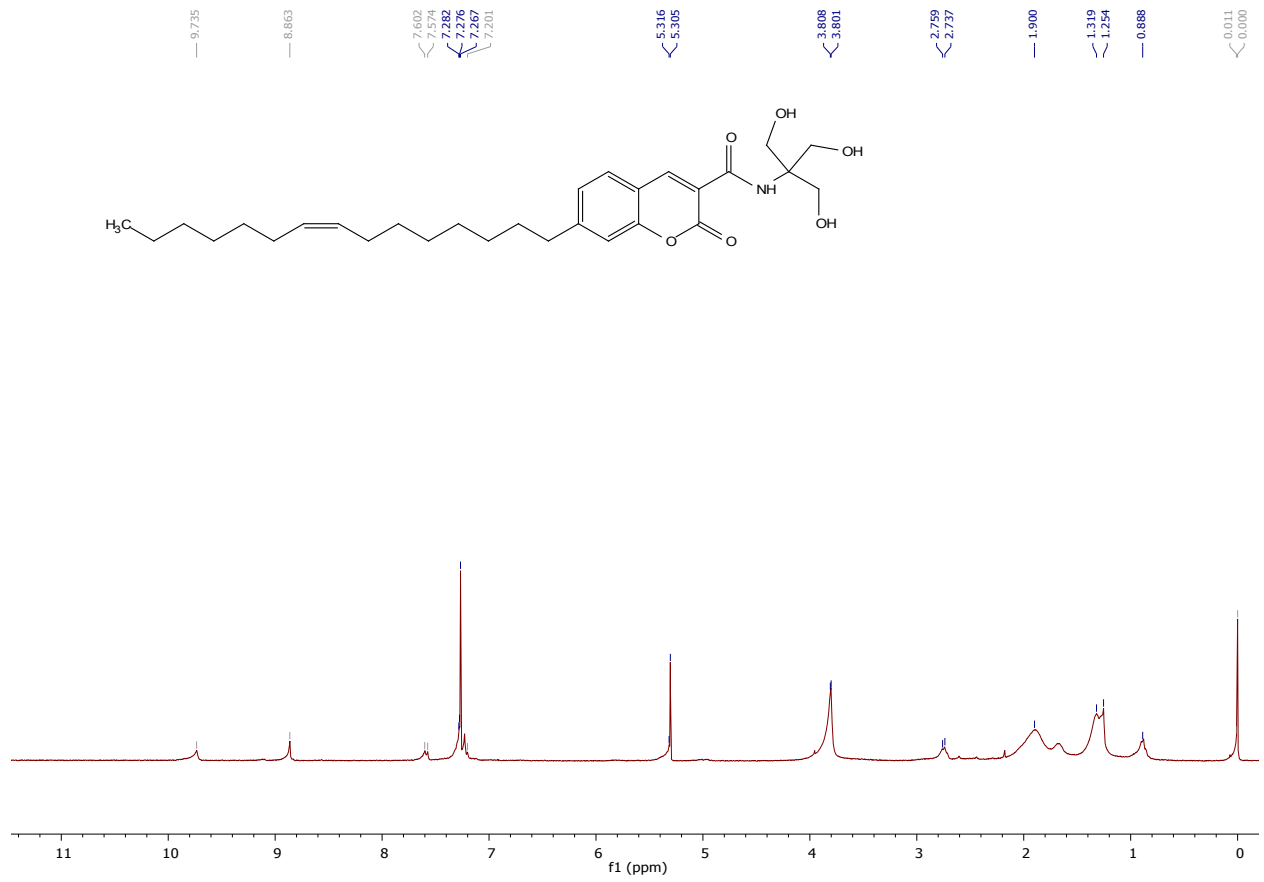

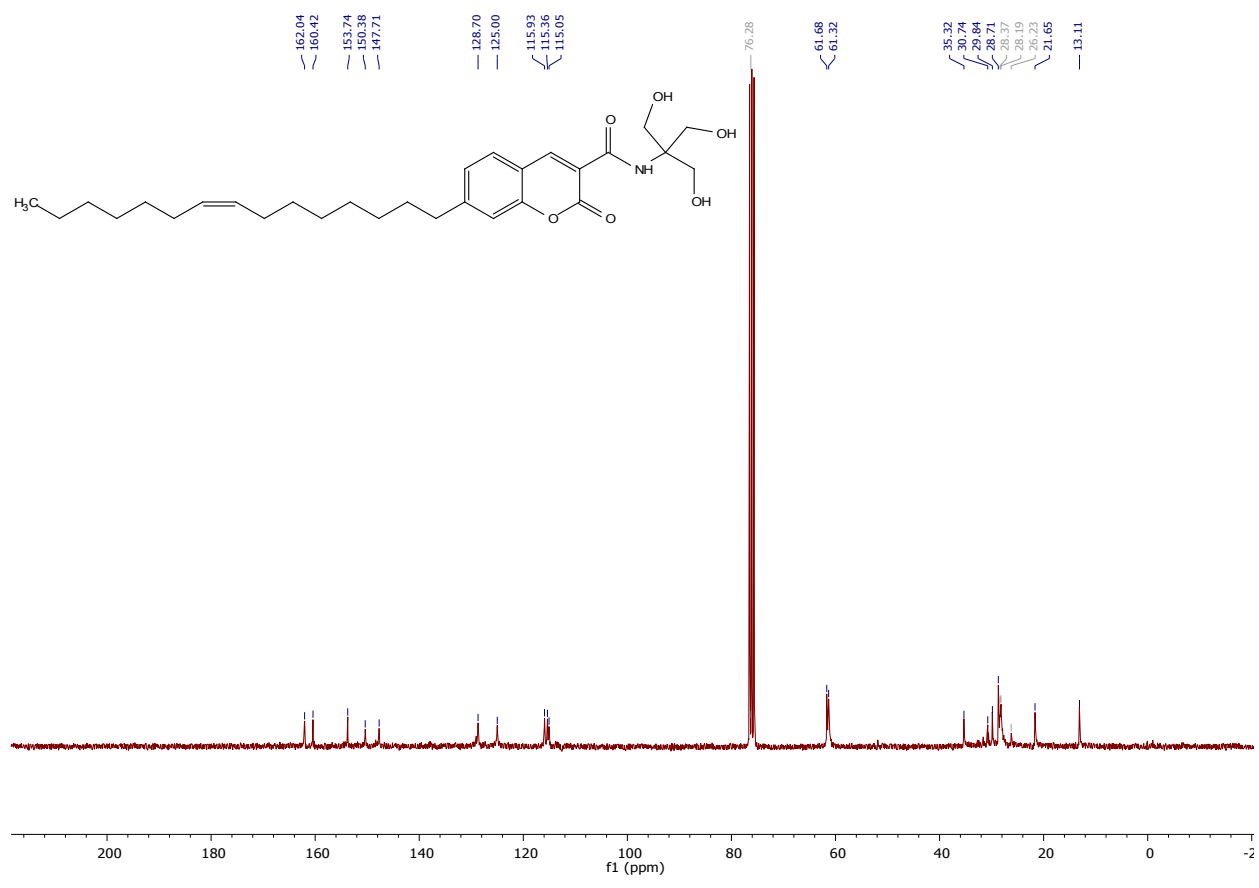



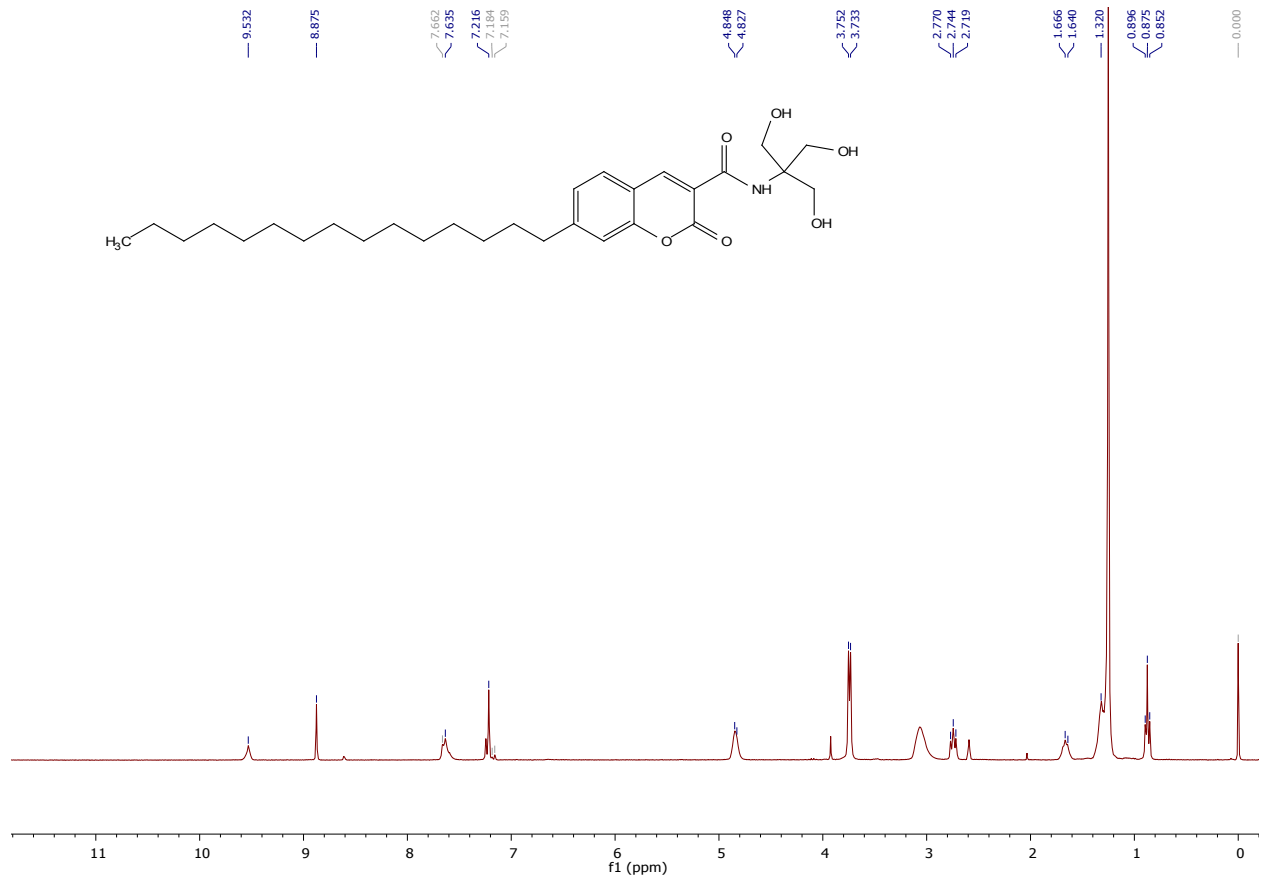

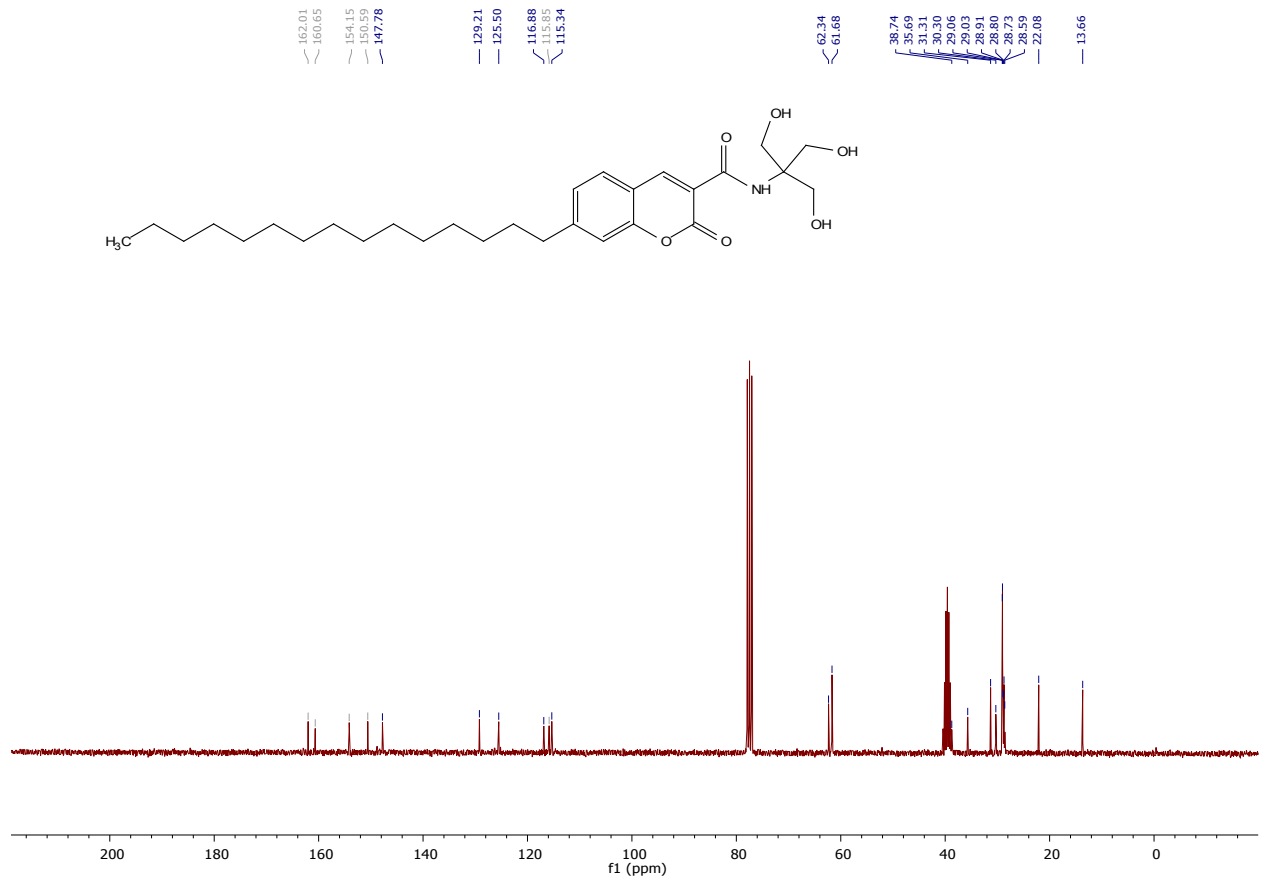

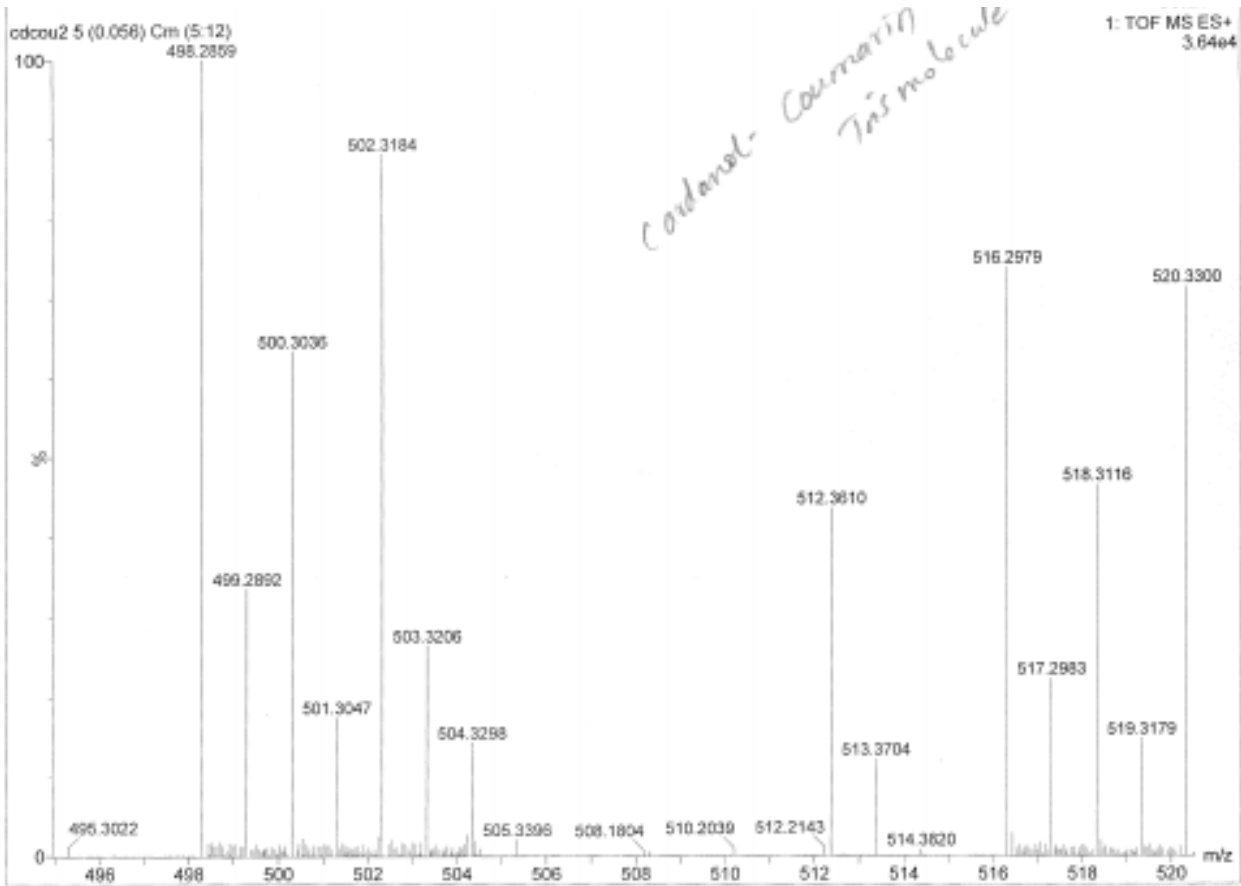

Mass spectra of compound 4b

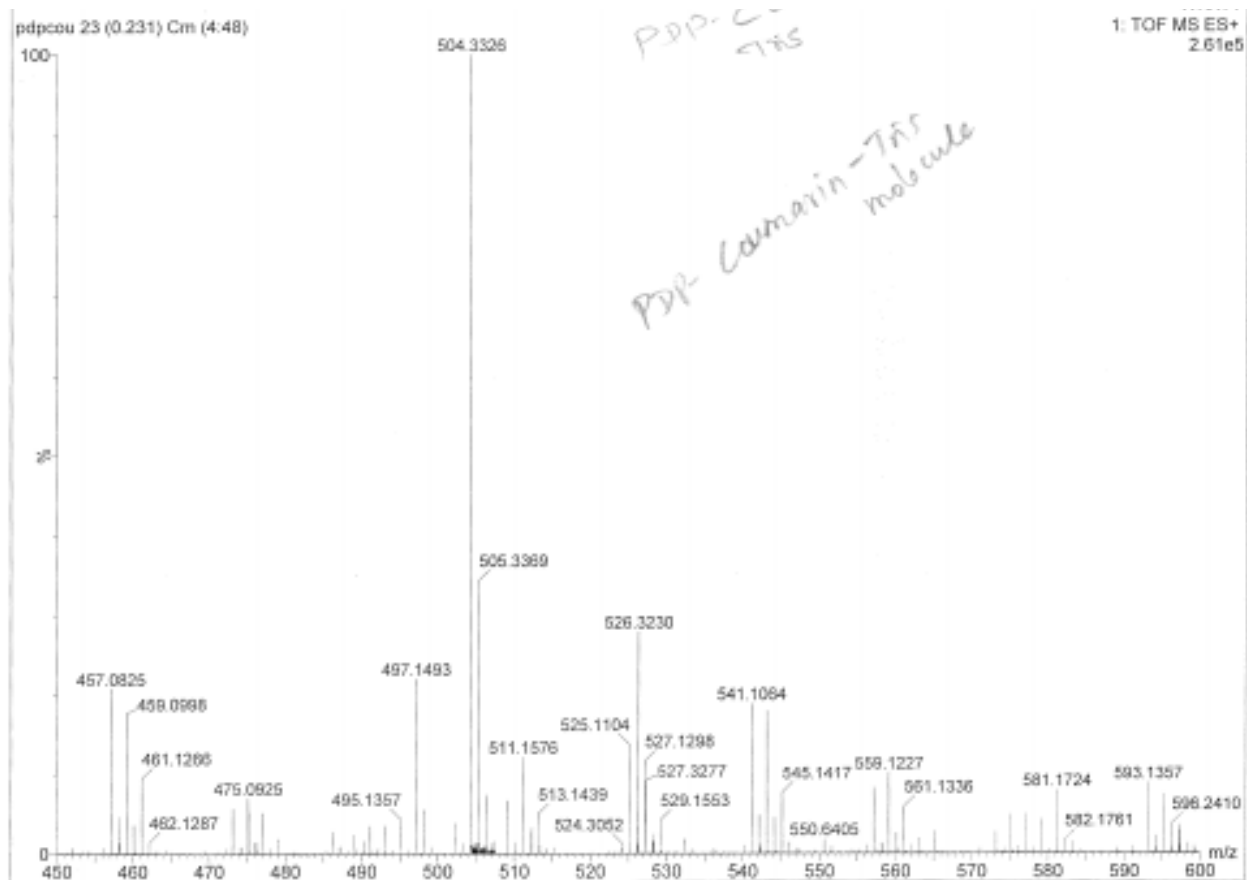

Mass spectra of Compound 4c
